# Supplementary material for: cAMP-Dependent Signaling Pathways as Potential Targets for Inhibition of Plasmodium falciparum Blood Stages
Source: Front Microbiol. 2021 May 24;12:684005. doi: 10.3389/fmicb.2021.684005 (PMC8183823; doi:10.3389/fmicb.2021.684005)
Supplement: Supplementary Table 4 — Putative PfPKA substate proteins from Supplementary Tables 1–3 with protein interaction networks from STRING and gene disruption phenotypes from RMgmDB. [file Table_4.XLSX]

## Sheet: Sheet1
Table S4. Putative PfPKA substate proteins from TableS1-S3 with protein interaction networks from STRING and gene disruption phenotypes from RMgmDB
Gene ID PlasmoDB	Gene name	Gene Symbol	Previous ID(s)	Molecular Weight	SignalP Peptide	TM Domains	EC numbers	PPI cluster from STRING (https://string-db.org/)	functional annotation PPI cluster	nr proteins per PPI cluster	RMgmDB acnr (https://www.pberghei.eu/batchsearch.php)	Successful gene disruption modification	Phenotype Asexual blood stage different from WT
PF3D7_0108700	secreted ookinete protein, putative	PSOP24	MAL1P2.15;PFA0430c	135624	YES	2		1	Nuclear metabolic protein complex	17	RMgm-82	no
PF3D7_0416400	histone acetyltransferase, putative	HAT1	MAL4P1.154;PFD0795w	146724	NO	0	2.3.1.48 (Histone acetyltransferase)	1	Nuclear metabolic protein complex	17	RMgm-2268	yes	YES
PF3D7_0526200	ADP-ribosylation factor GTPase-activating protein 2	ARFGAP2	MAL5P1.261;PF3D7_0526200.1;PF3D7_0526200.2;PFE1305c	58598	NO	0	3.1.3.- (Phosphoric monoester hydrolases.)	1	Nuclear metabolic protein complex	17	RMgm-3371	yes	YES
PF3D7_0617200	BFR1 domain-containing protein, putative		2270.t00061;MAL6P1.254;PFF0835w	52980	NO	0		1	Nuclear metabolic protein complex	17	RMgm-3018	no
PF3D7_0626800	pyruvate kinase	PyrK	2270.t00155;MAL6P1.160;PFF1300w	55660	NO	0	2.7.1.40 (Pyruvate kinase)	1	Nuclear metabolic protein complex	17	RMgm-3069	no
PF3D7_0726500	ubiquitin carboxyl-terminal hydrolase, putative		MAL7P1.147	373166	NO	0	3.4.19.12 (Ubiquitinyl hydrolase 1)	1	Nuclear metabolic protein complex	17	RMgm-1713	no
PF3D7_0815800	vacuolar protein sorting-associated protein 9, putative	VPS9	MAL8P1.82	214690	NO	0		1	Nuclear metabolic protein complex	17	RMgm-2247	no
PF3D7_0904800	replication protein A1, small fragment	RPA1	PFI0235w	56234	NO	0		1	Nuclear metabolic protein complex	17
PF3D7_1004300	E3 ubiquitin-protein ligase, putative		PF10_0046	131696	NO	0	6.3.2.- (Acid--amino-acid ligases (peptide synthases).)	1	Nuclear metabolic protein complex	17	RMgm-3176	yes	YES
PF3D7_1008100	PHD finger protein PHD1	PHD1	PF10_0079	453003	NO	0		1	Nuclear metabolic protein complex	17
PF3D7_1132000	ubiquitin-like protein, putative		PF11_0329	101122	NO	0		1	Nuclear metabolic protein complex	17	RMgm-2556	yes	YES
PF3D7_1145100	coatomer subunit gamma, putative	SEC21	PF11_0463	124368	NO	0		1	Nuclear metabolic protein complex	17	RMgm-2487	yes	YES
PF3D7_1224000	GTP cyclohydrolase 1	GCH1	2277.t00231;MAL12P1.231;PFL1155w	45876	NO	0	3.5.4.16 (GTP cyclohydrolase I)	1	Nuclear metabolic protein complex	17	RMgm-3936; RMgm-4612	yes	YES / NO
PF3D7_1238800	acyl-CoA synthetase	ACS11	2277.t00376;MAL12P1.374;PFL1880w	92091	NO	0	6.2.1.3 (Long-chain-fatty-acid--CoA ligase)	1	Nuclear metabolic protein complex	17	RMgm-4009	yes	YES
PF3D7_1248900	26S protease regulatory subunit 8, putative	RPT6	2277.t00469;MAL12P1.468;PFL2345c	49544	NO	0	3.6.4.3 (Transferred entry: 5.6.1.1)	1	Nuclear metabolic protein complex	17
PF3D7_1304500	small heat shock protein, putative		PF13_0021	25195	NO	0		1	Nuclear metabolic protein complex	17	RMgm-4291	yes	YES
PF3D7_1345800	conserved Plasmodium protein, unknown function		PF13_0243	118919	NO	0		1	Nuclear metabolic protein complex	17	RMgm-3689	yes	YES
PF3D7_0106300	calcium-transporting ATPase	ATP6	MAL1P1.54;PFA0310c	139413	NO	8	7.2.2.10 (P-type Ca(2+) transporter)	2	Pellicle-associated protein complex	20	RMgm-1431; RMgm-1692	no
PF3D7_0109000	photosensitized INA-labeled protein PHIL1	PHIL1	MAL1P2.17;PFA0440w	25477	NO	0		2	Pellicle-associated protein complex	20	RMgm-1679; RMgm-4366	no
PF3D7_0414900	armadillo-domain containing rhoptry protein	ARO	MAL4P1.139;PFD0720w	30817	NO	0		2	Pellicle-associated protein complex	20
PF3D7_0418600	regulator of chromosome condensation, putative		MAL4P1.175;PFD0900w	236356	NO	0		2	Pellicle-associated protein complex	20	RMgm-2276	yes	YES
PF3D7_0525800	inner membrane complex protein 1g, putative	IMC1g	MAL5P1.257;PFE1285w	34340	NO	0		2	Pellicle-associated protein complex	20	RMgm-3369	no
PF3D7_0618000	conserved Plasmodium membrane protein, unknown function		2270.t00470;MAL6P1.247;PFF0870w	92754	NO	4		2	Pellicle-associated protein complex	20
PF3D7_0720700	phosphoinositide-binding protein, putative		MAL7P1.108;MAL7P1.109	258424	NO	4		2	Pellicle-associated protein complex	20
PF3D7_0817900	high mobility group protein B2	HMGB2	MAL8P1.72	11534	NO	0		2	Pellicle-associated protein complex	20	RMgm-162; RMgm-1251; RMgm-1251	yes	YES
PF3D7_0822900	conserved Plasmodium protein, unknown function		PF08_0035	138241	NO	0		2	Pellicle-associated protein complex	20	RMgm-4149	yes	not tested
PF3D7_1003600	inner membrane complex protein 1c, putative	IMC1c	PF10_0039	32653	NO	0		2	Pellicle-associated protein complex	20	RMgm-3172	yes	YES
PF3D7_1010300	succinate dehydrogenase subunit 4, putative	SDH4	PF10_0100	13736	NO	2	1.2.1.- (With NAD(+) or NADP(+) as acceptor.)	2	Pellicle-associated protein complex	20	RMgm-3209	yes	YES
PF3D7_1026600	conserved Plasmodium protein, unknown function		PF10_0262	196490	NO	0		2	Pellicle-associated protein complex	20
PF3D7_1115800	conserved Plasmodium protein, unknown function		PF11_0166	33880	NO	0		2	Pellicle-associated protein complex	20
PF3D7_1125800	kelch domain-containing protein, putative		PF11_0268	67620	NO	0		2	Pellicle-associated protein complex	20	RMgm-2586	no
PF3D7_1251200	coronin		2277.t00492;MAL12P1.489;PFL2460w	69014	NO	0	2.3.1.48 (Histone acetyltransferase)	2	Pellicle-associated protein complex	20	RMgm-1497	yes	NO
PF3D7_1303500	sodium/hydrogen exchanger	NHE	PF13_0019	226081	NO	14		2	Pellicle-associated protein complex	20
PF3D7_1340900	sodium-dependent phosphate transporter	PiT	MAL13P1.206	75294	YES	10	2.6.1.1 (Aspartate transaminase)	2	Pellicle-associated protein complex	20
PF3D7_1343700	kelch protein K13	Kelch13	PF13_0238	83664	NO	0	3.1.4.17 (3',5'-cyclic-nucleotide phosphodiesterase)	2	Pellicle-associated protein complex	20
PF3D7_1423300	serine/threonine protein phosphatase 7	PP7	PF14_0224	112583	NO	0	3.1.3.16 (Protein-serine/threonine phosphatase)	2	Pellicle-associated protein complex	20	RMgm-1056; RMgm-2813	no
PF3D7_1455300	conserved protein, unknown function		PF14_0527	69527	NO	0		2	Pellicle-associated protein complex	20	RMgm-509; RMgm-3496	no
PF3D7_0303200	HAD superfamily protein, putative		MAL3P1.12;PFC0150w	134737	NO	0	3.1.3.4 (Phosphatidate phosphatase)	3	Nuclear protein complex	12	RMgm-1834	no
PF3D7_0810300	protein phosphatase PPM5, putative	PPM5	MAL8P1.109	63619	NO	0	3.1.3.16 (Protein-serine/threonine phosphatase)	3	Nuclear protein complex	12	RMgm-3874	yes	YES
PF3D7_1008500	protein GPR89, putative		2296.t00400;PF10_0082	154747	YES	10		3	Nuclear protein complex	12
PF3D7_1012700	NLI interacting factor-like phosphatase, putative	NIF4	PF10_0124	171011	NO	0	3.1.3.16 (Protein-serine/threonine phosphatase)	3	Nuclear protein complex	12	RMgm-1064	no
PF3D7_1019900	autophagy-related protein 8	ATG8	PF10_0193	14650	NO	0		3	Nuclear protein complex	12	RMgm-1475; RMgm-1953	no
PF3D7_1124600	ethanolamine kinase	EK	PF11_0257	49913	NO	0	2.7.1.82 (Ethanolamine kinase)	3	Nuclear protein complex	12	RMgm-2590	yes	YES
PF3D7_1140400	conserved Plasmodium protein, unknown function		PF11_0415	18601	NO	0		3	Nuclear protein complex	12	RMgm-2513	yes	YES
PF3D7_1209300	telomere repeat-binding zinc finger protein	TRZ	2277.t00094;MAL12P1.93;PFL0465c	170851	NO	0		3	Nuclear protein complex	12	RMgm-4316	yes	YES
PF3D7_1232500	CG2-related protein, putative		2277.t00313;MAL12P1.312;PFL1565c	127119	NO	0		3	Nuclear protein complex	12	RMgm-3985	yes	YES
PF3D7_1330400	ER lumen protein retaining receptor 1, putative		MAL13P1.163;PF3D7_1330400.1;PF3D7_1330400.2	32805	NO	8		3	Nuclear protein complex	12	RMgm-3615	no
PF3D7_1346400	VPS13 domain-containing protein, putative		MAL13P1.234	697045	NO	0	3.4.25.1 (Proteasome endopeptidase complex)	3	Nuclear protein complex	12
PF3D7_1361800	glideosome-associated connector	GAC	MAL13P1.308	291019	NO	0		3	Nuclear protein complex	12	RMgm-725	yes	not tested
PF3D7_0104300	ubiquitin carboxyl-terminal hydrolase 1, putative	UBP1	MAL1P1.34b;PFA0215w;PFA0220w	416036	NO	0	3.4.19.12 (Ubiquitinyl hydrolase 1)	4	Nuclear protein complex involved in metabolism and gene expression	16
PF3D7_0108300	conserved Plasmodium protein, unknown function	ARP	MAL1P2.10;PFA0410w	254991	NO	0		4	Nuclear protein complex involved in metabolism and gene expression	16
PF3D7_0305500	protein dopey homolog, putative		MAL3P2.18;PFC0245c	467878	NO	0		4	Nuclear protein complex involved in metabolism and gene expression	16
PF3D7_0517300	serine/arginine-rich splicing factor 1	SR1	MAL5P1.173;PFE0865c	34560	NO	0		4	Nuclear protein complex involved in metabolism and gene expression	16
PF3D7_0519700	FoP domain-containing protein, putative		MAL5P1.198;PFE0990w	22733	NO	0		4	Nuclear protein complex involved in metabolism and gene expression	16
PF3D7_0706500	conserved Plasmodium protein, unknown function		MAL7P1.204	196568	NO	0		4	Nuclear protein complex involved in metabolism and gene expression	16
PF3D7_0801800	mannose-6-phosphate isomerase, putative		MAL8P1.156	117661	NO	1	5.3.1.8 (Mannose-6-phosphate isomerase)	4	Nuclear protein complex involved in metabolism and gene expression	16	RMgm-3313	yes	YES
PF3D7_0815600	eukaryotic translation initiation factor 3 subunit G, putative	EIF3G	MAL8P1.83	31250	NO	0		4	Nuclear protein complex involved in metabolism and gene expression	16
PF3D7_0916700	RNA-binding protein musashi, putative	HoMu	PFI0820c	45142	NO	0		4	Nuclear protein complex involved in metabolism and gene expression	16
PF3D7_1008800	nucleolar protein 5, putative	NOP5	PF10_0085	53409	NO	0		4	Nuclear protein complex involved in metabolism and gene expression	16
PF3D7_1011800	PRE-binding protein	PREBP	PF10_0115	131625	NO	0		4	Nuclear protein complex involved in metabolism and gene expression	16	RMgm-3215	no
PF3D7_1107300	polyadenylate-binding protein-interacting protein 1, putative	PAIP1	PF11_0086	381871	NO	0		4	Nuclear protein complex involved in metabolism and gene expression	16	RMgm-2673	no
PF3D7_1110400	RNA-binding protein, putative		PF11_0111	173922	NO	0		4	Nuclear protein complex involved in metabolism and gene expression	16	RMgm-2663	no
PF3D7_1120000	conserved protein, unknown function		PF11_0207	128950	NO	0		4	Nuclear protein complex involved in metabolism and gene expression	16	RMgm-2608	yes	YES
PF3D7_1212700	eukaryotic translation initiation factor 3 subunit A, putative	EIF3A	2277.t00126;MAL12P1.125;PFL0625c	166059	NO	0		4	Nuclear protein complex involved in metabolism and gene expression	16
PF3D7_1312900	eukaryotic translation initation factor 4 gamma	EIF4G	MAL13P1.63	146647	NO	0		4	Nuclear protein complex involved in metabolism and gene expression	16	RMgm-3796	no
PF3D7_0506900	rhomboid protease ROM4	ROM4	MAL5P1.70;PFE0340c	86653	NO	6	3.4.21.105 (Rhomboid protease)	5	Apical signal transduction protein complex	18	RMgm-2951	yes	YES
PF3D7_0515700	glideosome-associated protein 40, putative	GAP40	MAL5P1.157;PFE0785c	51799	NO	10		5	Apical signal transduction protein complex	18	RMgm-1402; RMgm-3009; RMgm-4144	no
PF3D7_0528400	palmitoyltransferase DHHC7	DHHC7	MAL5P1.281;PFE1415w	48241	NO	4	2.3.1.225 (Protein S-acyltransferase)	5	Apical signal transduction protein complex	18	RMgm-891	yes	YES
PF3D7_0609800	palmitoyltransferase DHHC2, putative	DHHC2	2270.t00216;MAL6P1.101;PFF0485c	33146	NO	4	2.3.1.225 (Protein S-acyltransferase)	5	Apical signal transduction protein complex	18	RMgm-1350; RMgm-4897	no
PF3D7_0802600	adenylyl cyclase beta	ACbeta	MAL8P1.150	269539	NO	0	4.6.1.1 (Adenylate cyclase)	5	Apical signal transduction protein complex	18	RMgm-3309	no
PF3D7_0934800	cAMP-dependent protein kinase catalytic subunit	PKAc	PFI1685w	40196	NO	0	2.7.11.11 (cAMP-dependent protein kinase)	5	Apical signal transduction protein complex	18	RMgm-543; RMgm-2465	no
PF3D7_1133400	apical membrane antigen 1	AMA1	PF11_0344	72041	YES	1	2.7.4.3 (Adenylate kinase)	5	Apical signal transduction protein complex	18	RMgm-953	yes	YES
PF3D7_1138400	guanylyl cyclase alpha	GCalpha	PF11_0395	496017	NO	19	4.6.1.2 (Guanylate cyclase)	5	Apical signal transduction protein complex	18	RMgm-2525	yes	YES
PF3D7_1209500	cGMP-specific 3',5'-cyclic phosphodiesterase alpha	PDEalpha	2277.t00096;MAL12P1.95;PF3D7_1209500.1;PF3D7_1209500.2;PFL0475w	115411	NO	6	3.1.4.- (Phosphoric diester hydrolases.)	5	Apical signal transduction protein complex	18
PF3D7_1222700	glideosome-associated protein 45	GAP45	2277.t00218;MAL12P1.218;PFL1090w	23631	NO	0		5	Apical signal transduction protein complex	18
PF3D7_1223100	cAMP-dependent protein kinase regulatory subunit	PKAr	2277.t00222;MAL12P1.222;PFL1110c	50832	NO	0	2.7.11.12 (cGMP-dependent protein kinase)	5	Apical signal transduction protein complex	18
PF3D7_1321500	3',5'-cyclic nucleotide phosphodiesterase beta	PDEbeta	MAL13P1.118;PF3D7_1321500.1;PF3D7_1321500.2	133167	NO	6	3.1.4.- (Phosphoric diester hydrolases.)	5	Apical signal transduction protein complex	18	RMgm-3832	no
PF3D7_1343800	conserved Plasmodium protein, unknown function		MAL13P1.380	905765	NO	2		5	Apical signal transduction protein complex	18
PF3D7_1409400	conserved protein, unknown function		PF14_0091;PF14_0092	30538	NO	4		5	Apical signal transduction protein complex	18	RMgm-495	yes	NO
PF3D7_1436600	cGMP-dependent protein kinase	PKG	PF14_0346	97692	NO	0	2.7.11.12 (cGMP-dependent protein kinase)	5	Apical signal transduction protein complex	18	RMgm-325; RMgm-544	no
PF3D7_1437300	conserved Plasmodium protein, unknown function		PF14_0353	25486	NO	0		5	Apical signal transduction protein complex	18	RMgm-2102	no
PF3D7_1443000	serine/threonine protein kinase	SRPK2	PF14_0408	150094	NO	0	2.7.11.1 (Non-specific serine/threonine protein kinase)	5	Apical signal transduction protein complex	18	RMgm-3438; RMgm-529	yes	YES / NO
PF3D7_0217500	calcium-dependent protein kinase 1	CDPK1	PF02_0166;PFB0815w	60799	NO	0	2.7.11.17 (Calcium/calmodulin-dependent protein kinase)	5; 6	Rhoptry and apical protein complex interacting with host	18; 17	RMgm-1813; RMgm-966; RMgm-1218	yes	YES / NO /NO
PF3D7_0302200	cytoadherence linked asexual protein 3.2	CLAG3.2	MAL3P1.2;PFC0110w	167488	YES	0		6	Rhoptry and apical protein complex interacting with host	17
PF3D7_0302500	cytoadherence linked asexual protein 3.1	CLAG3.1	MAL3P1.5;PFC0120w	167240	YES	0		6	Rhoptry and apical protein complex interacting with host	17
PF3D7_0407800	protein CINCH	CINCH	MAL4P2.14;PFD0385w	230122	NO	0		6	Rhoptry and apical protein complex interacting with host	17
PF3D7_0501600	rhoptry-associated protein 2	RAP2	MAL5P1.17;PFE0080c	46738	YES	0		6	Rhoptry and apical protein complex interacting with host	17	RMgm-2921; RMgm-4428	yes	YES
PF3D7_0508900	conserved Plasmodium protein, unknown function		MAL5P1.90;PFE0440w	370179	NO	0		6	Rhoptry and apical protein complex interacting with host	17
PF3D7_0722200	rhoptry-associated leucine zipper-like protein 1	RALP1	MAL7P1.119	87878	YES	1		6	Rhoptry and apical protein complex interacting with host	17	RMgm-2147	no
PF3D7_0802800	serine/threonine protein phosphatase 2B catalytic subunit A	CNA	PF08_0129	70074	NO	0	3.1.3.16 (Protein-serine/threonine phosphatase)	6	Rhoptry and apical protein complex interacting with host	17	RMgm-1052; RMgm-3307	no
PF3D7_0803200	filament assembling protein, putative		MAL8P1.146	86742	NO	0	1.9.3.1 (Cytochrome-c oxidase)	6	Rhoptry and apical protein complex interacting with host	17
PF3D7_0919800	TLD domain-containing protein		PFI0970c	124915	NO	0		6	Rhoptry and apical protein complex interacting with host	17
PF3D7_0929400	high molecular weight rhoptry protein 2	RhopH2	PFI1445w	162663	YES	0	2.7.1.226 (L-serine kinase (ADP))	6	Rhoptry and apical protein complex interacting with host	17	RMgm-2439	yes	YES
PF3D7_0930300	merozoite surface protein 1	MSP1	PFI1475w	195724	YES	1		6	Rhoptry and apical protein complex interacting with host	17	RMgm-326; RMgm-2442	no
PF3D7_1025900	conserved protein, unknown function		PF10_0254;PF10_0255;PF10_0256	156662	NO	0		6	Rhoptry and apical protein complex interacting with host	17
PF3D7_1027300	peroxiredoxin	nPrx	PF10_0268	43929	NO	0	1.11.1.15 (Peroxiredoxin)	6	Rhoptry and apical protein complex interacting with host	17	RMgm-1986	yes	YES
PF3D7_1252100	rhoptry neck protein 3	RON3	2277.t00499;MAL12P1.496;PFL2505c	263153	YES	3	4.2.1.134 (Very-long-chain (3R)-3-hydroxyacyl-CoA dehydratase)	6	Rhoptry and apical protein complex interacting with host	17
PF3D7_1348600	conserved Plasmodium protein, unknown function		PF13_0255	44369	NO	0		6	Rhoptry and apical protein complex interacting with host	17
PF3D7_1410400	rhoptry-associated protein 1	RAP1	PF14_0102	90052	YES	0		6	Rhoptry and apical protein complex interacting with host	17	RMgm-2867; RMgm-4411	yes	YES
PF3D7_0210900	conserved Plasmodium protein, unknown function		PF02_0102;PFB0490c	32541	NO	0					RMgm-1776	yes	YES
PF3D7_0404300	conserved Plasmodium protein, unknown function		MAL4P1.41b;PFD0207c	74182	NO	0
PF3D7_0610400	histone H3	H3	2270.t00211;MAL6P1.106;PFF0510w	15445	NO	0	3.6.1.- (In phosphorus-containing anhydrides.)				RMgm-1648	no
PF3D7_0711500	regulator of chromosome condensation, putative		MAL7P1.38	78896	NO	0					RMgm-3283	yes	YES
PF3D7_0818900	heat shock protein 70	HSP70	PF08_0054	73914	NO	0	1.3.1.74 (2-alkenal reductase (NAD(P)(+)))
PF3D7_0821800	protein transport protein SEC61 subunit beta, putative	SEC61B	MAL8P1.51	8629	NO	1					RMgm-2210	no
PF3D7_0823800	DnaJ protein, putative		PF08_0032	76681	NO	3					RMgm-2199	yes	YES
PF3D7_1021700	conserved Plasmodium membrane protein, unknown function		PF10_0211;PF10_0212	830189	NO	5					RMgm-1960	yes	YES
PF3D7_1105100	histone H2B	H2B	PF11_0062	13125	NO	0					RMgm-2683	no
PF3D7_1366900	conserved protein, unknown function		MAL13P1.336	78574	NO	0					RMgm-3148	no
